# Supplementary material for: Polarity switching mass spectrometry imaging of healthy and cancerous hen ovarian tissue sections by infrared matrix-assisted laser desorption electrospray ionization (IR-MALDESI)
Source: Royal Society of Chemistry journal article supplement (doi:10.1039/c5an01513h), 2015-09-21
Supplement: c5an01513h1.pdf [file c5an01513h1.pdf]

## Polarity Switching Mass Spectrometry Imaging of Healthy and Cancerous Hen Ovarian Tissue Sections by Infrared Matrix-Assisted Laser Desorption Electrospray Ionization (IR-MALDESI)

Milad Nazari and David C. Muddiman\*

W. M. Keck FTMS Laboratory for Human Health Research, Department of Chemistry, North Carolina State University, Raleigh, NC 27695

### Electronic Supplementary Information

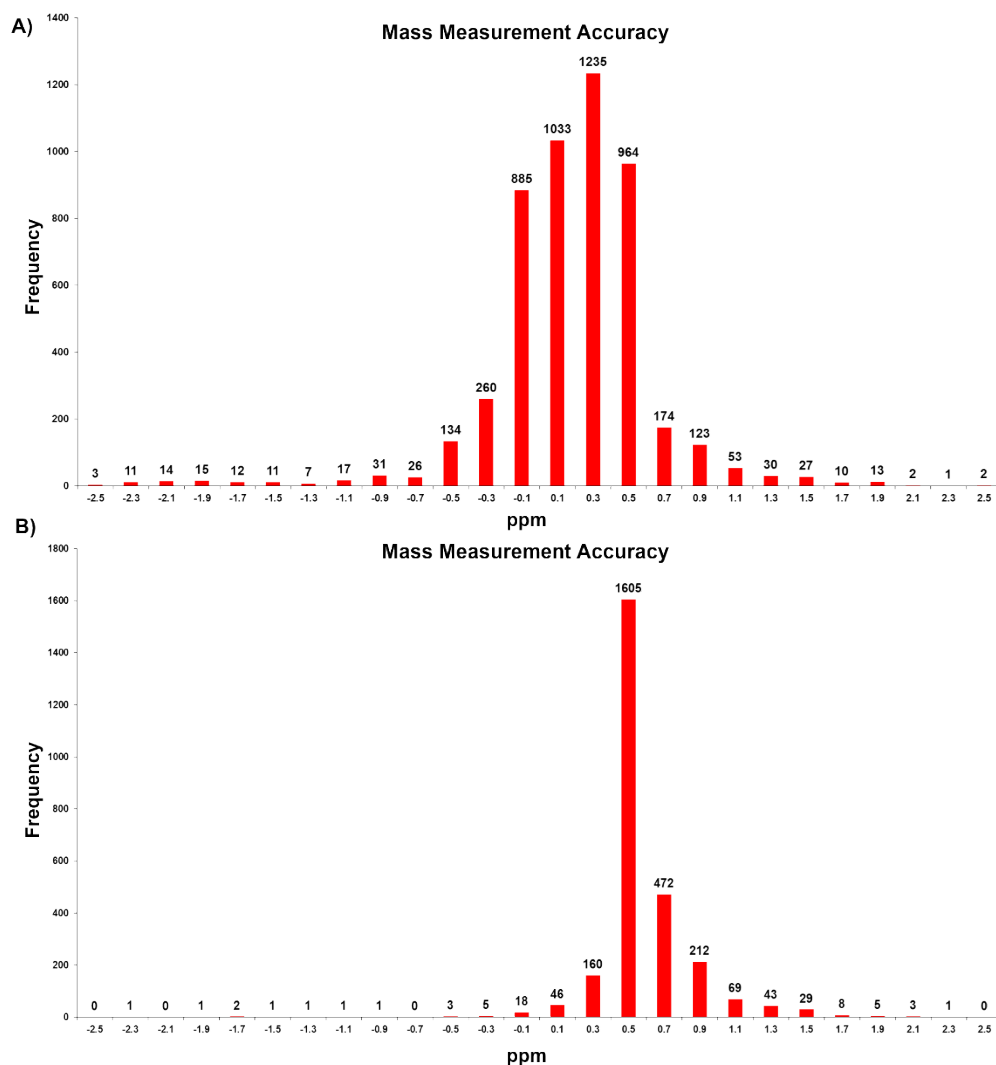

**Figure S1.** High mass measurement accuracy obtained in polarity switching IR-MALDESI MSI for cholesterol ( $m/z$  369.3516  $[M-H_2O+H^+]^+$ ) in healthy (**A**) and cancerous (**B**) tissue sections.

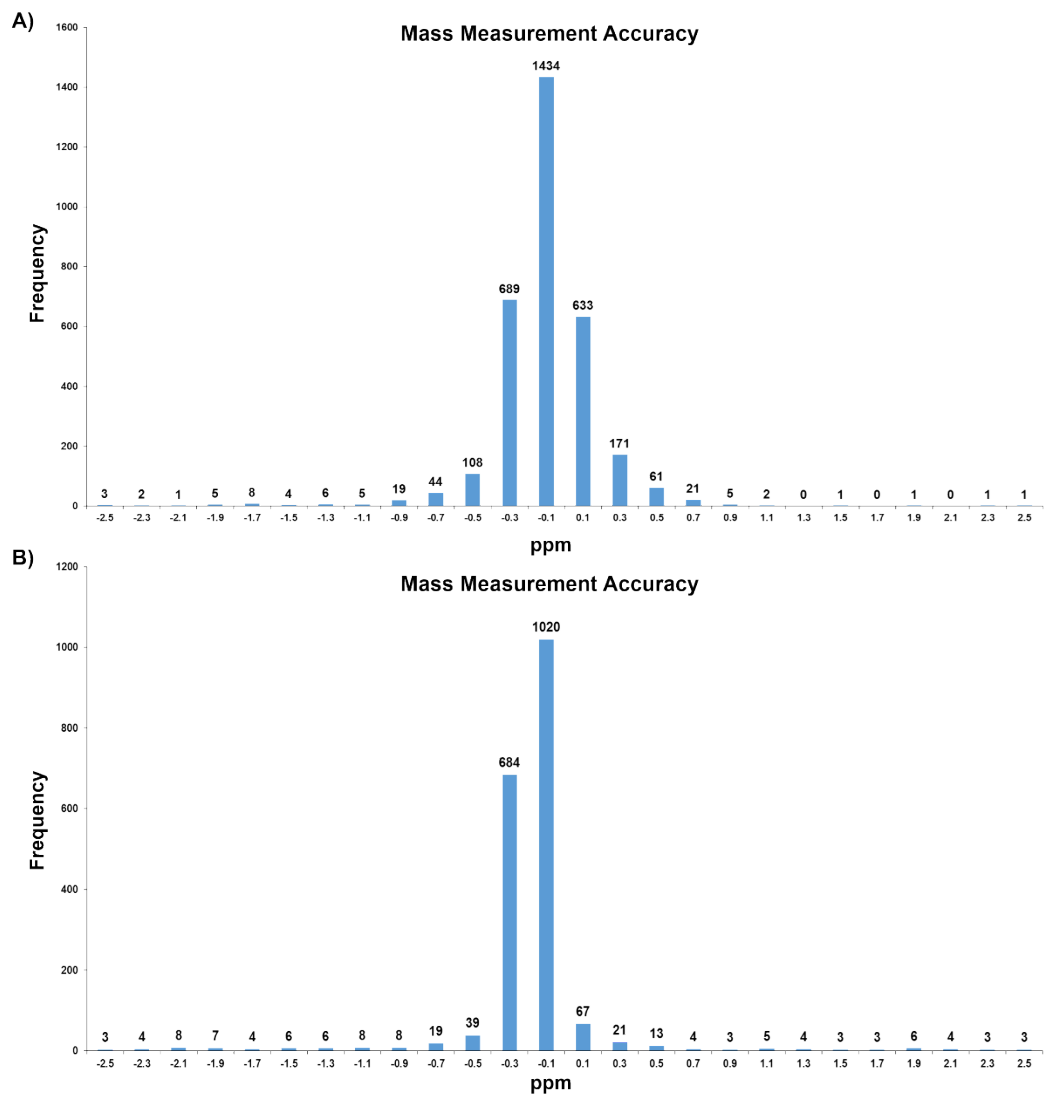

**Figure S2.** High mass measurement accuracy obtained in polarity switching IR-MALDESI MSI for glutathione ( $m/z$  306.0766 [M-H<sup>+</sup>]) in healthy **(A)** and cancerous **(B)** tissue sections.

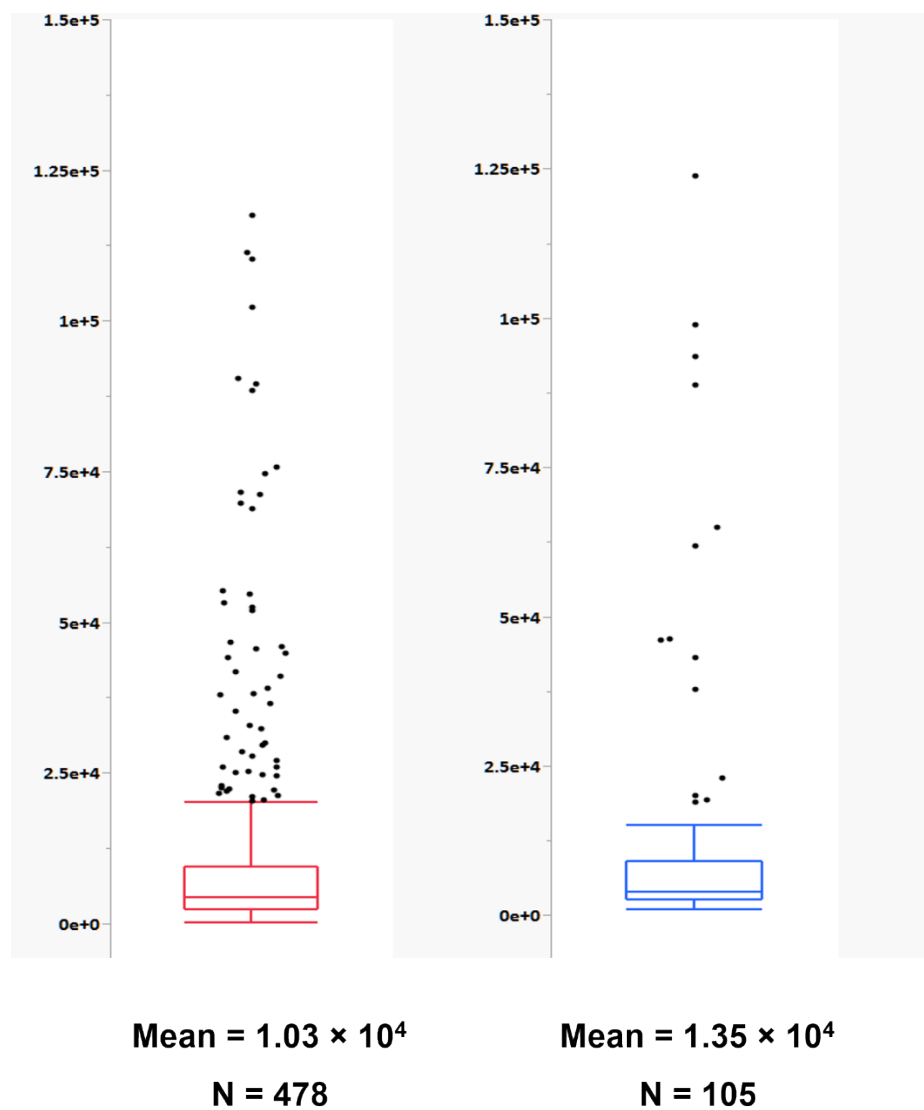

**Figure S3.** Box plots of tissue-specific ion abundances in mouse liver in positive- and negative-ion modes with acetic acid as the solvent modifier. The plots show that the optimized solvent (50:50 MeOH/H<sub>2</sub>O, with 1 mM acetic acid) did not exhibit a systematic bias for one ionization mode over the other.
